# Supplementary material
Source: PubMed Central journal article supplement (PMC10191517)
Supplement: pg9-2-e061-s001.pdf [file pg9-2-e061-s001.pdf]

## Supplementary table – List of questions in the questionnaire

1. Participating center:
2. City:
3. Country:
4. Local principal investigator:
5. Contact details:
6. Doctors performing endoscopy at your center:
  - Paediatric gastroenterologist
  - Paediatric gastroenterology trainee
  - Paediatric surgeon
  - Paediatric surgeon trainee
  - Adult gastroenterologist
  - Adult gastroenterology trainee
  - Other (please specify)
7. Average number of endoscopies per year at your center?
  - <100
  - 100-500
  - 500-1000
  - >1000
8. Did your center postpone/cancel elective endoscopies due to COVID-19 outbreak?
  - Yes
  - NoIf yes, from which date?
9. When did the quarantine start in your city?
10. Were the patients tested for COVID-19 before the endoscopic procedures?
  - Yes
  - NoIf yes, from which date?
11. Were the endoscopy staff routinely tested for COVID-19?
  - Yes
  - NoIf yes, from which date?

12. Were the endoscopy staff tested for COVID-19 if they have shown symptoms?

- Yes
- No

If yes, from which date?

13. Did the number of staff involved in the endoscopy suite change during the pandemic?

- Yes
- No

14. Staff involved at the endoscopy suite:

- Endoscopist
- Anesthesiologist
- Nurse anesthetist
- Endoscopy nurse
- Other

15. What is the average number of staff involved during an endoscopy at your center?

- 0-3
- 3-5
- 5-10

16. Did you make any changes in your personal practice based on the ESPGHAN COVID-19 endoscopy statement?

- Yes
- No

17. Has your institution set out guidelines as to which cases are considered emergent/urgent and/or can proceed?

- Yes
- No

18. Do you have any additional disinfecting steps of the endoscopy suite due to COVID-19?

- Yes
- No

If yes, please specify

19. Specify the personal protective equipment (PPE) used during endoscopic procedures:

- Protective goggles
- Face shield
- Single pair of gloves
- Double pair of gloves
- Surgical mask
- FFP2/3 mask
- Waterproof gown
- Other (please specify which)
